1 **Confidence reports in decision-making with multiple alternatives**  
2 **violate the Bayesian confidence hypothesis**

3

4 Hsin-Hung Li<sup>1</sup> & Wei Ji Ma<sup>1,2</sup>

5

6 <sup>1</sup>Department of Psychology, New York University, New York, NY

7 <sup>2</sup>Center for Neural Science, New York University, New York, NY

8

9 Correspondence: [hsin.hung.li@nyu.edu](mailto:hsin.hung.li@nyu.edu) (H-H. L.)

10

## 11 **Abstract**

12       Decision confidence reflects our ability to evaluate the quality of decisions and guides  
13 subsequent behaviors. Experiments on confidence reports have almost exclusively focused on  
14 two-alternative decision-making. In this realm, the leading theory is that confidence reflects  
15 the probability that a decision is correct (the posterior probability of the chosen option). There  
16 is, however, another possibility, namely that people are less confident if the *best two* options  
17 are closer to each other in posterior probability, regardless of how probable they are in  
18 *absolute* terms. This possibility has not previously been considered because in two-alternative  
19 decisions, it reduces to the leading theory. Here, we test this alternative theory in a three-  
20 alternative visual categorization task. We found that confidence reports are best explained by  
21 the difference between the posterior probabilities of the best and the next-best options, rather  
22 than by the posterior probability of the chosen (best) option alone, or by the overall  
23 uncertainty (entropy) of the posterior distribution. Our results upend the leading notion of  
24 decision confidence and instead suggest that confidence reflects the observer's subjective  
25 probability that they made the best possible decision.

26

27

28

## 29 Introduction

30 Confidence refers to the “sense of knowing” that comes with a decision. Confidence  
31 affects the planning of subsequent actions after a decision<sup>1, 2</sup>, learning<sup>3</sup>, and cooperation in  
32 group decision making<sup>4</sup>. Failures in utilizing confidence information have been linked to  
33 psychiatric disorders<sup>5</sup>.

34 While human observers can report their self-assessment of the quality of their decisions<sup>6, 7</sup>,  
35 <sup>8, 9, 10, 11, 12</sup>, the computations underlying confidence reports are still insufficiently understood.  
36 The leading theory of confidence suggested that confidence reflects the probability that a  
37 decision is correct<sup>7, 8, 13, 14, 15, 16, 17</sup>. We refer to this idea as the “Bayesian confidence  
38 hypothesis” meaning that the decision-maker uses the posterior probability of the chosen  
39 category (i.e. the probability that decision is correct) for their confidence reports. In  
40 neurophysiological studies, a brain region or a neural process is considered to represent  
41 confidence if its responses correlate with the probability that a decision is correct<sup>18, 19, 20</sup>.  
42 Behavioral studies testing whether human confidence reports follow Bayesian confidence  
43 hypothesis have shown mixed results: While some studies found resemblances between  
44 Bayesian confidence and empirical data e.g. <sup>18, 19, 21, 22</sup>, others have suggested that confidence  
45 reports deviate from the Bayesian confidence hypothesis e.g. <sup>23, 24, 25</sup>.

46 Even though the Bayesian confidence hypothesis is the leading theory of confidence, there  
47 is currently no evidence to rule out the possibility that confidence is affected by unchosen  
48 options. Specifically, people could be less confident if the next-best option is very close to the  
49 best option. In other words, confidence could depend on the *difference* between the posterior  
50 probabilities of the best and the next-best options, rather than on the absolute value of the  
51 posterior of the best option. This idea has not been tested because previous studies of decision  
52 confidence have predominantly used two-alternative decision tasks; in such tasks, the  
53 alternative hypothesis is equivalent to the Bayesian confidence hypothesis, because the  
54 difference between the two posterior probabilities in a two-alternative task is a monotonic  
55 function of the highest posterior probability. Thus, to dissociate these two models of  
56 confidence, we need more than two alternatives. Therefore, we use a three-alternative  
57 decision task. To preview our main result, we find that the difference-based model accounts

58 well for the data, whereas the model corresponding to the Bayesian confidence hypothesis and  
59 a third, entropy-based model do not.

60

## 61 **Results**

62 To investigate the computations underlying confidence reports in the presence of multiple  
63 alternatives, we designed a three-alternative categorization task. On each trial, participants  
64 viewed a large number of exemplar dots from each of the three categories (color-coded),  
65 along with one target dot in a different color (**Figure 1A**). Each category corresponded to an  
66 uncorrelated, circularly symmetric Gaussian distribution in the plane. We asked participants  
67 to regard the stimulus as a bird's eye view of three groups of people. People within a group  
68 wear shirts of the same color, and the target dot represents a person from one of the three  
69 groups. Participants made two responses: the category of the target, and their confidence in  
70 their decision on a four-point Likert scale.

71 To manipulate participants' beliefs (posterior probability distribution), we used different  
72 configurations of the category distributions and varied the position of the target dot within  
73 each configuration (**Figure 1B and 1C**). This design allowed us to test quantitative models of  
74 how the posterior distribution gives rise to confidence reports (see an illustration of this idea  
75 in **Supplementary Figure 1**).

76

### 77 **Model**

78 *Generative model.* Each category is equally probable. We assume that the observer makes  
79 a noisy measurement  $\mathbf{x}$  of the position  $\mathbf{s}$  of the target dot. We model the noise as obeying a  
80 circularly symmetric Gaussian distribution centered at the target dot.

81 *Decision model.* We now consider a Bayesian observer. We assume that the observer  
82 knows that each category is equally probable, and knows the distribution associated with each  
83 category (group) based on the exemplar dots. Given a measurement  $\mathbf{x}$ , the posterior  
84 probability of category  $C$  is then

85

86 
$$p(C|\mathbf{x}) = \frac{p(\mathbf{x}|\mathbf{s})p(\mathbf{s}|C)}{\sum_{C=1}^3 p(\mathbf{x}|\mathbf{s})p(\mathbf{s}|C)}. \quad (1)$$

87

88 We further assume that due to decision noise or inference noise, the observer might not  
89 maintain the exact posterior distribution,  $p(C|\mathbf{x})$ , but instead a noisy version of it. This type of  
90 decision noise is consistent with the notion that a portion of variability in behavior is due to  
91 “late noise” at the level of decision variable<sup>26, 27, 28</sup>. We modeled decision noise by drawing a  
92 noisy posterior distribution from a Dirichlet distribution around the true posterior (**Figure 2A-**  
93 **B**; See details in **Methods**). In our case, the true posterior, which we denote by  $\mathbf{p}$ , consists of  
94 the three posterior probabilities from Eq.(1):  $\mathbf{p}=(p(C=1|\mathbf{x}), p(C=2|\mathbf{x}), p(C=3|\mathbf{x}))$ . The  
95 magnitude of the decision noise, the amount of variation around  $\mathbf{p}$ , is (inversely) controlled by  
96 a concentration parameter  $\alpha > 0$ . When  $\alpha \rightarrow \infty$ , the variation vanishes and the posterior is  
97 noiseless. In general, the “noisy posterior”, which we denote as a vector  $\mathbf{p}_{\text{noisy}}$ , satisfies

98 
$$\mathbf{p}_{\text{noisy}} \sim \text{Dirichlet}(\alpha \mathbf{p})$$

99 We assume that when reporting the category of the target, the observer chooses the  
100 category  $C$  with the highest  $p_{\text{noisy}}(C|\mathbf{x})$ . Unless otherwise specified, from now on we will refer  
101 to the noisy posterior distribution as simply the posterior distribution.

102 We introduce three models of confidence reports: the *Max* model, the *Entropy* model and  
103 the *Difference* model. Each of these models contains two steps: a) mapping the posterior  
104 distribution ( $\mathbf{p}_{\text{noisy}}$ ) to a real-valued confidence variable; b) applying three criteria to this  
105 confidence variable to divide its space into four regions, which then map in increasing order  
106 to the four confidence ratings. The second step accounts for every possible monotonic  
107 mapping from the confidence variable to the four-point confidence rating. The three models  
108 differ in the first step.

109 The *Max* model corresponds to the Bayesian confidence hypothesis. In this model, the  
110 confidence variable is the probability that the chosen category is correct, or in other words, it  
111 is the highest of the three posterior probabilities (**Figure 2C**). In this model, the observer is

112 least confident when the posterior distribution is uniform. Importantly, confidence is never  
113 influenced by the posterior probabilities of the categories that were not chosen.

114 In the *Difference* model, the confidence variable is the difference between the highest and  
115 second-highest posterior probabilities. In this model, confidence is low if the evidence for the  
116 next-best option is strong, and the observer is least confident whenever the two most probable  
117 categories are equally probable. One interpretation of this model is that confidence reflects the  
118 observer's subjective probability that they made the *best possible* choice, regardless of the  
119 actual posterior probability of that choice. An alternative interpretation is that decision-  
120 making consists of an iterative process in which the observer reduces a multiple-choice task to  
121 simpler (binary) choices (see Discussion).

122 In the *Entropy* model, the confidence variable is the negative of the uncertainty conveyed  
123 by the entire posterior distribution, quantified by its negative entropy. High confidence is  
124 associated with low entropy, and vice versa. Like in the Max model, the observer is least  
125 confident when the posterior distribution is uniform. Unlike in the Max model, however, the  
126 posterior probabilities of the non-chosen categories affect confidence. See the details of the  
127 models in **Methods**.

128 Note that all three models are Bayesian in a way that they compute the posterior  
129 probability distribution, and categorize the target dot by choosing the category with the  
130 highest posterior. The three models differ in how the confidence variable is read out from the  
131 posterior distribution. Only the Max model corresponds to the Bayesian confidence  
132 hypothesis. Only the Max model assumes that the posterior of the unchosen categories does  
133 not affect confidence. Importantly, in our three-alternative task, these models generate  
134 qualitatively different mappings from the posterior distribution to the confidence variable  
135 (**Figure 2C**). In a standard two-alternative task, however, the models would have been  
136 indistinguishable, because the probability of the non-chosen category would be determined by  
137 the probability of the chosen category.

138 We fitted the free parameters to the data of each individual subject using maximum-  
139 likelihood estimation, where the data on a given trial consist of a decision-confidence pair.  
140 Thus, we accounted for the joint distribution of decisions and confidence ratings<sup>24, 25, 29</sup> (see  
141 **Methods**). We compared models using the Akaike Information Criterion (AIC; Akaike, 1998).  
142 A model recovery analysis suggests that if the true model is among our tested models, our

143 model comparison procedure is able to identify the correct model (see **Methods** and  
144 **Supplementary Figure 3**).

145

## 146 **Experiment 1**

147 In Experiment 1, the centers of the three category distributions were aligned vertically  
148 (**Figure 1B**). There were four conditions: In the first two conditions, the centers were evenly  
149 spaced horizontally. In the last two conditions, the center of the central distribution was closer  
150 to the center of either the left or the right distribution. The vertical position of the target dot  
151 was sampled from a normal distribution, and the horizontal position of the target dot was  
152 sampled uniformly between the center of the leftmost and right-most classes plus an extension  
153 to the left and the right (see **Methods**).

154 We plotted the psychometric curves (mean confidence rating as a function of the  
155 horizontal position of the target dot) by averaging confidence reports across trials using a  
156 sliding window (**Figure 3**). Mean confidence rating varied as a function of the horizontal  
157 position of the target. In the first two conditions (**Figure 3**), where the three distributions were  
158 evenly spaced, the psychometric curves showed two dips, with the lowest confidence attained  
159 at two positions symmetric around  $0^\circ$ .

160 We simulated the predicted psychometric curves using the best-fitting parameters of each  
161 model (**Figure 3B**). The fits of the Max and the Difference models resembled the data, but the  
162 best fit of the Entropy model showed a dip at the center in the first condition.

163 In the third and fourth conditions, in which the three distributions were unevenly spaced,  
164 mean confidence was lowest around the centers of the two distributions that were closest to  
165 each other. Only the Difference model exhibited this pattern, while the Max and the Entropy  
166 models deviated more clearly from the data.

167 The models not only make predictions for confidence ratings, but also for the category  
168 decisions (**Supplementary Figure 2**). Participants categorized the target dot based on its  
169 location, and when the target dot was close to the boundary between two categories (the  
170 location where two categories have equal likelihood), they assigned the target to those two  
171 categories with nearly equal probabilities. In general, this pattern is consistent with an  
172 observer who chooses the category associated with the highest posterior probability. The

173 Entropy model fits worst, even though all three models used the same rule for the category  
174 decision; this is because the confidence data also need to be accounted for.

175 Using the Akaike Information Criterion for model comparison (**Figure 4A and**  
176 **Supplementary Table 1**), we found that the Difference model outperformed the Max model  
177 by a group-averaged AIC score of  $27.3 \pm 7.0$  (mean  $\pm$  s.e.m.) and the Entropy model by  $149 \pm$   
178  $25$  (mean  $\pm$  s.e.m.).

179 We further tested reduced versions of each of the three confidence models by removing  
180 either the sensory noise or the decision noise from the model. The Difference model  
181 outperformed the Max model and the Entropy model regardless of these manipulations  
182 (**Supplementary Figure 4 and Supplementary Table 1**). The sensory noise played a minor  
183 role in this task compared to the decision noise. For example, removing the sensory noise  
184 from the Difference model increased the AIC by  $9.9 \pm 3.2$ , while removing the inference  
185 noise increased the AIC by  $57.3 \pm 6.5$ . Using the Bayesian information criterion<sup>30</sup> for model  
186 comparison led to the same conclusions (**Supplementary Figure 5**).

187

## 188 **Experiment 2**

189 In Experiment 2, we aimed to test whether the findings in Experiment 1 could be  
190 generalized to other stimulus configurations, where the centers of the categories varied in a  
191 two-dimensional space. We tested four conditions in which the centers of the three groups  
192 varied along both horizontal and vertical axis (**Figure 1C**). We sampled the target dot  
193 positions uniformly within a circular area centered on the screen. In addition, the distribution  
194 of the categories used in Experiment 2 allowed us to probe confidence reports in a wider  
195 range of posterior distributions (**Supplementary Figure 1B**). For example, we can probe the  
196 confidence report when the target dot had the same distance to all three categories in  
197 Experiment 2, but not in Experiment 1.

198 The “psychometric curve” now is a heat map in two dimensions (**Figure 5**). The fits to  
199 these psychometric curves showed different patterns among the three models: When the three  
200 groups formed an equilateral triangle (**Figure 5**, the first and second columns), the confidence  
201 (as a function of target location) estimated by the Entropy model exhibited contours that were  
202 more convex than that in the data. In the last two conditions (**Figure 5**, the third and fourth  
203 columns), compared to the other two models, the Difference model showed stronger



204 resemblance to the data, as the model exhibited an extended low confidence region at the side  
205 where two categories were positioned closely. The results of model comparisons were  
206 consistent with Experiment 1. The Difference model outperformed the Max model by a  
207 group-averaged AIC score of  $45.9 \pm 8.5$  (mean  $\pm$  s.e.m.) and the Entropy model by  $152 \pm 25$   
208 (mean  $\pm$  s.e.m.) (**Figure 4B and Supplementary Table 1**). The model with both sensory and  
209 inference noise explained the data the best, and the inference noise had a stronger influence  
210 on the model fit than the sensory noise (**Supplementary Figure 4B, Supplementary Figure**  
211 **5B and Supplementary Table 1**).

212

### 213 **Experiment 3**

214 So far, we found that the Difference model fits the data better than the Max and the  
215 Entropy. However, whether participants report the probability that a decision is correct (the  
216 Max model) might depend on the experimental design. In Experiment 1 and 2, participants  
217 received no feedback on their category decision. Thus, the probability of being correct in the  
218 task could be difficult to learn. To investigate this issue, in Experiment 3, using the same four  
219 stimulus configurations as those in Experiment 1 (**Figure 1B**), we randomly chose one of the  
220 three groups as the true target category in each trial, and sampled the target position from the  
221 distribution of the true category. Feedback was presented at the end of each trial, informing  
222 participants of the true category.

223 The results of model comparison were consistent with Experiment 1. The Difference  
224 model outperformed the Max model by a group-averaged AIC score of  $10.3 \pm 2.9$  (mean  $\pm$   
225 s.e.m.) and the Entropy model by  $93 \pm 18$  (mean  $\pm$  s.e.m.) (**Supplementary Figure 6 and**  
226 **Supplementary Table 1**). The model with both sensory and inference noise explained the  
227 data the best, and the inference noise had a stronger influence on the model fit than the  
228 sensory noise (**Supplementary Figure 4C and 5C**).

229

### 230 **Discussion**

231 To distinguish the leading model of perceptual confidence (the Bayesian confidence  
232 hypothesis) from a new alternative model in which confidence is affected by the posterior  
233 probabilities of unchosen options, we studied human confidence reports in a three-alternative

234 perceptual decision task. We found that confidence is best described by the Difference model,  
235 in which confidence reflects the difference between the strength of observers' belief (posterior  
236 probability) of the top two options in a decision. The Max model (which corresponds to the  
237 Bayesian confidence hypothesis) and the Entropy model (in which confidence is derived from  
238 the entropy of the posterior distribution) fell short in accounting for the data. Our results were  
239 robust under changes of stimulus configurations (Experiment 1 and 2), and when trial-by-trial  
240 feedback was provided (Experiment 3). Our results demonstrate that the posterior  
241 probabilities of the unchosen categories impact confidence in decision-making.

242 Decision tasks with multiple alternatives not only allow us to dissociate different  
243 computational models of confidence, they are also ecologically important. In the real world,  
244 human and other animals often face decisions with multiple alternatives, such as identifying  
245 the color of a traffic light, recognizing a person, categorizing a species of an animal, online  
246 shopping, or making a medical diagnosis.

247 Our models can be generalized to categorical choice with more than three alternatives.  
248 Specifically, the Difference model predicts that besides the posterior probabilities of the top  
249 two options, the posterior of the other options does not matter as long as they add up to the  
250 same total. A special type of categorical choice is when the world state variable is continuous  
251 (e.g. in an orientation estimation task) but gets discretized for the purpose of the experiment.  
252 Consider the specific case that the posterior distribution is Gaussian. An observer following  
253 the Difference model would compute the difference between the posteriors of the two discrete  
254 options closest to the peak. This serves as a very coarse approximation to the curvature of the  
255 posterior distribution at its peak, which, for Gaussians, is monotonically related to its inverse  
256 variance, consistent with an earlier model in which confidence is based on the precision  
257 parameter of the posterior<sup>29</sup>. Outside the realm of Gaussian and similar distributions, the  
258 Difference model and van den Berg et al.'s model (2017) might be distinguishable. For  
259 example, when the posterior distribution is bimodal, with the modes slightly different in  
260 height, the variance of the posterior is dominated by the separation between the modes,  
261 whereas the Difference model will use the difference in height for confidence reports.

262 Although many behavioral studies have emphasized similarities between human  
263 confidence reports and predictions of Bayesian models e.g. <sup>18, 19, 21, 22</sup>, the Bayesian  
264 confidence hypothesis has been questioned before<sup>8, 13, 14, 15, 16</sup>. In addition to the probability of

265 being correct, confidence is influenced by various factors such as reaction time<sup>31</sup>, post-  
266 decision processing<sup>32, 33, 34, 35</sup>, and the magnitude of positive evidence<sup>36, 37, 38, 39</sup>. Two model  
267 comparison studies have shown deviations from Bayesian confidence hypothesis in two-  
268 alternative decision tasks<sup>24, 25</sup>. However, in one study<sup>24</sup>, the experimental design did not allow  
269 the authors to strongly distinguish the model that was based on Bayesian confidence  
270 hypothesis from those that were not. Moreover, in both studies<sup>24, 25</sup>, the alternative models  
271 were based on heuristic decision rules without a broader theoretical interpretation. Here, we  
272 have identified a type of deviation from the Bayesian predictions that is not only of a  
273 qualitatively different nature, but that also raises new theoretical questions.

274 Specifically, the Difference model is currently a descriptive model. We have two  
275 suggestions to interpret it as an outcome of approximate inference. First, the Difference model  
276 might be an approximation to a model in which confidence depends on the probability that an  
277 observer made the *best possible* decision. Specifically, the observer is “aware” that their  
278 decision is based on the noisy posterior  $\mathbf{p}_{\text{noisy}}$  rather than the true posterior  $\mathbf{p}$ . Thus, it is  
279 possible that the chosen category is not the category with the highest probability in the true  
280 posterior. Confidence would be derived from the probability that the chosen category has the  
281 highest probability in the true posterior distribution. The observer achieves this computation  
282 using the evidence for the next-best option: The stronger the evidence for the next-best option,  
283 the more likely that the chosen category is not the top choice in the true posterior, thus leading  
284 to lower confidence. Recent work has shown that subjective confidence guides information  
285 seeking during decision-making<sup>40</sup>. Under the Difference model, during information seeking,  
286 the observer’s goal is to make sure that the best option is better than the alternative options.  
287 Low confidence would encourage the observer to collect more information in order to  
288 strengthen the belief that the best option is better than the next-best option.

289 Second, the finding that confidence is best described by the relative strength of the  
290 evidence of the top two options might be related to other findings in multiple-alternative  
291 decision-making. For example, in one experiment, observers watched columns of bricks build  
292 up on the screen, and reported which column had the highest accumulation rate<sup>41</sup>. A heuristic  
293 model in which the observer makes a decision when the height of the tallest column exceeds  
294 the height of the next-tallest column by a fixed threshold captured the overall pattern of  
295 people’s behavior. In a study on self-directed learning in a three-alternative categorization

296 task, observers had to learn the category distributions by sampling from the feature space and  
297 receiving feedback. Instead of choosing the most informative samples, human observers chose  
298 ones for which the likelihood of two categories were similar, namely those located at  
299 boundaries between pairs of two categories<sup>42</sup>. This literature allows us to speculate that  
300 observers might decompose a multiple-alternative decision into several simpler (perhaps  
301 binary) choices. This notion is reminiscent of the concept in prospect theory that before a  
302 phase of evaluation, extremely unlikely outcomes might be first discarded in an “editing”  
303 phase<sup>43</sup>. Hence, an alternative interpretation of our results is that confidence reports deviate  
304 from the Bayesian confidence hypothesis (the Max model) because the observer estimates the  
305 probability of correct in a way that ignores the options that are discarded before final  
306 evaluation. In the Difference model, the least favorite option is not completely discarded  
307 because it decreases the posterior probabilities of the other two options (and thus their  
308 difference) by contributing to the normalization pool<sup>44, 45</sup>. Therefore, we consider an extreme  
309 version of editing, the Ratio model, in which the least-favorite option does not even  
310 participate in normalization, and thus confidence solely depends on the likelihood ratio  
311 between the top two options. The Difference model and the Ratio model are not  
312 distinguishable in Experiment 1 and 2 (**Supplementary Figure 7**). In Experiment 3, the  
313 Difference model was very similar to the Ratio model in group-averaged AIC ( $3.8 \pm 1.4$  in  
314 favor of the Difference model). Testing variable numbers of categories within an experiment  
315 might help to differentiate between these two models.

316 We found that compared to the sensory noise, the noise associated with the computation  
317 of posterior probability plays a more important role in our task. This is consistent with the  
318 findings of a recent study<sup>26</sup>. The relative unimportance of sensory noise could be partly due to  
319 our experimental designs, which used stimuli with strong signal strength (saturated color and  
320 unlimited duration). Different from our study, Drugowitsch et al. (2016) devised an evidence  
321 accumulation task and further distinguished two types of decision noises: First, the inference  
322 noise that was added (and thus increased) with each new stimulus sample. Second, the  
323 selection noise that was injected only once at the final response. Because our experiment only  
324 had one stimulus in each trial, these two sources of variability were indistinguishable.

325 Do our results generalize beyond perceptual decision-making? In a two-alternative value-  
326 based decision task, observers reported confidence in a way that was similar to that in

327 perceptual decision tasks<sup>10</sup>: When observers were asked to choose the good with the higher  
328 value, confidence increased with the posterior probability that a decision is correct, which in  
329 turn increased with the difference in value between the two goods. In addition, choice  
330 accuracy was higher in high-confidence trials than in low-confidence trials, reflecting  
331 observers' ability to evaluate their own performance. It is unknown how observers compute  
332 confidence when there are more than two goods. In three-alternative value-based tasks, the  
333 Difference model would predict that, confidence is determined by the difference between the  
334 probability that the chosen item is the most valuable and the probability that the next-best  
335 item is the most valuable.

336 How does the present study advance our understanding of the neural basis of confidence?  
337 Most neurophysiological studies of confidence have considered the neural activity that  
338 correlates with the probability of being correct as the neural representation of confidence (but  
339 see <sup>48</sup>). Neural responses in parietal cortex<sup>19</sup>, orbitofrontal cortex<sup>18</sup> and pulvinar<sup>20</sup> have been  
340 associated with that representation of confidence.. These studies all used two-alternative  
341 decision tasks. Multiple-alternative decision tasks have been used in neurophysiological  
342 studies on non-human primates but not with the objective of studying confidence<sup>45, 49, 50, 51</sup>. By  
343 utilizing multiple-alternative tasks, neural studies could dissociate the neural correlates of  
344 probability correct from that of the “difference” confidence variable in the Difference model,  
345 which according to our results might be the basis of human subjective confidence. A  
346 potentially important difference between human and non-human animal studies is that in the  
347 latter, confidence is not explicitly reported but operationalized through some aspect of  
348 behavior, such as the probability of choosing a “safe” (opt-out) option<sup>19, 20, 46, 47, 48</sup>, or the time  
349 spent on waiting for reward<sup>18</sup>. Thus, one should be careful when directly comparing these  
350 implicit reports with explicit confidence reports in human studies.

351

## 352 **Methods**

### 353 **Setup**

354 Participants sat in a dimly lit room with the chin rest positioned 45 cm from the monitor.  
355 The stimuli and the experiment were controlled by customized programs written in Javascript.

356 The monitor had a resolution of 3840 by 2160 pixels and a refresh rate of 30 Hz. The  
357 spectrum and the luminance of the monitor were measured with a spectroradiometer.

358

### 359 **Participants**

360 Thirteen participants took part in Experiment 1. Eleven participants took part in  
361 Experiment 2. Eleven participants took part in Experiment 3. All participants had normal or  
362 corrected-to-normal vision. The experiments were conducted with the written consent of each  
363 participant. The University Committee on Activities involving Human Subjects at New York  
364 University approved the experimental protocols.

365

### 366 **Stimulus**

367 On each trial, three categories of exemplar dots (375 dots per category) were presented  
368 along with one target dot, a black dot (**Figure 1A**). The dots within a category were  
369 distributed as an uncorrelated, circularly symmetric Gaussian distribution with a standard  
370 deviation of  $2^\circ$  (degree visual angle) along both horizontal and vertical directions. Exemplar  
371 dots from the different categories were coded with different colors. The three colors were  
372 randomly chosen on each trial, and were equally spaced in Commission Internationale de  
373 l'Eclairage (CIE)  $L^*a^*b^*$  color space. The three colors were at a fixed lightness of  $L^*=70$  and  
374 were equidistant from the gray point ( $a^*=0$ , and  $b^*=0$ ).

375 In Experiment 1 and 3, the centers of the three categories were aligned vertically to the  
376 center of the screen, and were located at different horizontal positions (**Figure 1B**). In four  
377 configurations, the horizontal positions of the centers of the three categories were  $(-3^\circ, 0^\circ, 3^\circ)$ ,  
378  $(-4^\circ, 0^\circ, 4^\circ)$ ,  $(-3^\circ, -2^\circ, 3^\circ)$ , and  $(-3^\circ, 2^\circ, 3^\circ)$ , from the center of the screen respectively. In  
379 Experiment 2, the centers of the three categories varied on a 2-dimensional space (**Figure**  
380 **1C**). In four configurations, the horizontal positions of the centers of the three categories were  
381  $(-2^\circ, 0^\circ, 2^\circ)$ ,  $(-1.59^\circ, 0^\circ, 1.59^\circ)$ ,  $(-2^\circ, -2^\circ, 2^\circ)$ , and  $(-2^\circ, 2^\circ, 2^\circ)$ , from the center of the screen,  
382 respectively. The vertical positions of the centers were  $(1.16^\circ, -2.31^\circ, 1.16^\circ)$ ,  $(0.94^\circ, -1.84^\circ,$   
383  $0.94^\circ)$ ,  $(1.16^\circ, 0^\circ, 1.16^\circ)$ ,  $(1.16^\circ, 0^\circ, 1.16^\circ)$  from the center of the screen respectively.

384

### 385 **Procedures**

386 We told participants that the three groups of exemplar dots represented a bird's eye view  
387 of three groups of people. The three groups contained equal numbers of people. The black dot  
388 (the target) is a person from one of the three groups, but we do not know the color of her/his  
389 T-shirt. We asked participants to categorize the target to one of the three groups based on the  
390 (position) information conveyed by the dots, and report their confidence on a four-point  
391 Likert scale.

392 Each trial started with the onset of the stimulus and three rectangular buttons positioned at  
393 the bottom of the screen (**Figure 1A**). On each trial, participants first categorized the target to  
394 one of the three groups (based on the position information conveyed by the dots) by using the  
395 mouse to click on one of the three buttons. After participants reported their decision, the three  
396 buttons were replaced by four buttons (labeled as "very unconfident", "somewhat  
397 unconfident", "somewhat confident", and "very confident") for participants to report their  
398 confidence on the decision they made. The stimuli were presented throughout each trial.  
399 Reaction time (for both decision and confidence reports) was unlimited. After participants  
400 reported their confidence, all the exemplar dots and the rectangular buttons disappeared from  
401 the screen, and the next trial started after a 600 ms inter-trial-interval.

402 In Experiment 1, the vertical position of the target dot was sampled from a normal  
403 distribution ( $2^\circ$  std), and the horizontal position of the target dot was sampled uniformly  
404 between the center of the leftmost and rightmost categories plus a  $0.2^\circ$  extension to the left  
405 and the right. In Experiment 2, the target dot was uniformly sampled from a circular area  
406 ( $2.6^\circ$  radius) positioned at the center of the screen. No feedback was provided in Experiment  
407 1 and Experiment 2.

408 In Experiment 3, in each trial, we randomly chose one of the three categories with equal  
409 probability as the true category. We then positioned the target dot by sampling from the  
410 distribution of the true category. A feedback regarding the true category was provided at the  
411 end of each trial: After participants reported their confidence, all exemplar dots disappeared  
412 except that the exemplar dots from the true category remained on the screen for an extra 500  
413 ms. In each experiment, participants completed one 1-hr session (84 trials per configuration in  
414 Experiment 1 and 120 trials per configuration in Experiment 2 and 3). All the trials in one  
415 session were separated into 8 blocks with equal number of trials. Different configurations  
416 were randomized and interleaved within each block.



417

418 **Models**

419 *Generative model.* The target belongs to category  $C \in \{1, 2, 3\}$ . The two-dimensional  
 420 position  $\mathbf{s}$  of a target in category  $C$  is drawn from a two-dimensional Gaussian  $p(\mathbf{s}|C) = N(\mathbf{s};$   
 421  $\mathbf{m}_C, \sigma_s^2 \mathbf{I})$ , where  $\mathbf{m}_C$  is the center of category  $C$ ,  $\sigma_s^2$  is the variance of the stimulus distribution,  
 422 and  $\mathbf{I}$  is the 2-dimensional identity matrix. We assume that the observer make a noisy sensory  
 423 measurement  $\mathbf{x}$  of the target position. We model the sensory noisy using a Gaussian  
 424 distribution centered at  $\mathbf{s}$  with covariance matrix  $\sigma^2 \mathbf{I}$ . Thus, the distribution of  $\mathbf{x}$  given  
 425 category  $C$  is  $p(\mathbf{x}|C) = N(\mathbf{x}; \mathbf{m}_C, (\sigma_s^2 + \sigma^2) \mathbf{I})$ .

426 *Inference on a given trial.* We assume that the observer knows the mean and standard  
 427 deviation of each category based on the exemplar dots, and that the observer assumes that the  
 428 three categories have equal probabilities. The posterior probability of category  $C$  given the  
 429 measurement  $\mathbf{x}$  is then  $p(C|\mathbf{x}) \propto p(\mathbf{x}|C) = N(\mathbf{x}; \mathbf{m}_C, (\sigma_s^2 + \sigma^2) \mathbf{I})$ . Instead of the true posterior  
 430  $p(C|\mathbf{x})$ , the observer makes the decisions based on  $p_{\text{noisy}}(C|\mathbf{x})$ , a noisy version of the posterior  
 431 probability. We obtain a noisy posterior  $p_{\text{noisy}}(C|\mathbf{x})$  by drawing from a Dirichlet distribution.  
 432 The Dirichlet distribution is a generalization of the beta distribution. Just like the beta  
 433 distribution is a continuous distribution over the probability parameter of a Bernoulli random  
 434 variable, the Dirichlet distribution is a distribution over a vector that represents the  
 435 probabilities of any number of categories. The Dirichlet distribution is parameterized as

$$p(\mathbf{p}_{\text{noisy}} | \mathbf{p}; \alpha) = \frac{1}{B(\alpha \mathbf{p})} \prod_{i=1}^3 p_{ni}^{\alpha p_i - 1}$$

$$B(\alpha \mathbf{p}) = \frac{\prod_{i=1}^3 \Gamma(\alpha p_i)}{\Gamma(\sum_{i=1}^3 (\alpha p_i))}$$

436

437  $\mathbf{p}$  is a vector consists of the three posterior probabilities,  $\mathbf{p}=(p(C=1|\mathbf{x}), p(C=2|\mathbf{x}),$   
 438  $p(C=3|\mathbf{x}))$ .  $\mathbf{p}_{\text{noisy}}$  is a vector consists of the three posterior probabilities perturbed by the  
 439 decision noise,  $\mathbf{p}_{\text{noisy}}=(p_{\text{noisy}}(C=1|\mathbf{x}), p_{\text{noisy}}(C=2|\mathbf{x}), p_{\text{noisy}}(C=3|\mathbf{x}))$ . The mean of  $p_{\text{noisy}}(C|\mathbf{x})$  is  
 440  $p(C|\mathbf{x})$ . The concentration parameter  $\alpha$  inversely determines the magnitude of the decision



441 noise. To make a category decision, the observer chooses the category that maximizes the  
442 posterior probability:  $\hat{C} = \underset{C}{\operatorname{argmax}} p_{\text{noisy}}(C | \mathbf{x})$ .

443 We considered three models of confidence reports. We first specify in each model an  
444 internal continuous confidence variable  $c^*$ . In the *Max* (maximum a posteriori) model,  $c^*$  is  
445 the posterior probability of the chosen category:  $c^* = p_{\text{noisy}}(C = \hat{C} | \mathbf{x})$ . In the *Difference*  
446 model,  $c^*$  is a difference:  $c^* = p_{\text{noisy}}(C = \hat{C} | \mathbf{x}) - p_{\text{noisy}}(C = \hat{C}_2 | \mathbf{x})$ , where  $\hat{C}_2$  is the category  
447 with the second-highest posterior probability. In the *Entropy* model,  $c^*$  is the negative entropy  
448 of the posterior distribution:  $c^* = \sum_{C=1}^3 p_{\text{noisy}}(C | \mathbf{x}) \log p_{\text{noisy}}(C | \mathbf{x})$ .

449 In each model, the continuous confidence variable  $c^*$  is converted to a four-point  
450 confidence report  $c$  by imposing three confidence criteria  $b_1$ ,  $b_2$  and  $b_3$ . For example,  $c=3$   
451 when  $b_2 < c^* < b_3$ . We also included a lapse rate  $\lambda$  in each model; on a lapse trial, the observer  
452 presses a random button for both the decision and the confidence report. In addition to the  
453 models that included both sensory and decision noise, we took a factorial approach and tested  
454 various combinations of confidence model and sources of variability<sup>52, 53, 54</sup>. For each  
455 confidence model, we tested two reduced models by removing either the sensory noise (by  
456 setting  $\sigma=0$ ) or the decision noise (by setting  $p_{\text{noisy}}(C | \mathbf{x}) = p(C | \mathbf{x})$ ) from the model.

457 *Response probabilities.* So far, we have described the mapping from a measurement  $\mathbf{x}$  to a  
458 decision  $\hat{C}$  and a confidence report  $c$ . The measurement, however, is internal to the observer  
459 and unknown to the experimenter. Therefore, to obtain model predictions for a given  
460 parameter combination  $(\sigma, \alpha, b_1, b_2, b_3, \lambda)$ , we perform a Monte Carlo simulation. For every  
461 true target position  $\mathbf{s}$  that occurs in the experiment, we simulated a large number (10,000) of  
462 measurements  $\mathbf{x}$ . For each of these measurements, we compute the posterior  $p(C | \mathbf{x})$ , add  
463 decision noise to obtain  $p_{\text{noisy}}(C | \mathbf{x})$ , and finally obtain a category decision  $\hat{C}$  and a confidence  
464 report  $c$ . Across all simulated measurements, we obtain a joint distribution  
465  $p(\hat{C}, c | \mathbf{s}; \sigma, \alpha, b_1, b_2, b_3, \lambda)$  that represents the response probabilities of the observer.

466 *Model fitting and model comparison.* We denote the parameters  $(\sigma, \alpha, b_1, b_2, b_3, \lambda)$   
467 collectively by  $\theta$ . We fit each model to individual-subject data by maximizing the log

468 likelihood of  $\theta$ ,  $\log L(\theta) = \log p(\text{data}|\theta)$ . We assume that the trials are conditionally  
469 independent. We denote the target position, category response, and four-point confidence  
470 report on the  $i$ th trial by  $\mathbf{s}_i$ ,  $\hat{C}_i$ , and  $c_i$ , respectively. Then, the log likelihood becomes

$$471 \quad \log L(\theta) = \log \prod_i p(\hat{C}_i, c_i | \mathbf{s}_i, \theta) = \sum_i \log p(\hat{C}_i, c_i | \mathbf{s}_i, \theta),$$

472 where  $p(\hat{C}_i, c_i | \mathbf{s}_i, \theta)$  is obtained from the Monte Carlo simulation described above. We  
473 optimized the parameters using a new method called Bayesian Adaptive Direct Search<sup>55</sup>. We  
474 used AIC and BIC for model comparison. To report the AIC (or BIC) index, we computed the  
475 AIC (or BIC) for each individual and then averaged the AIC across participants.

476

### 477 **Parameterization**

478 The full version of the three confidence models (Max, Difference and Entropy models  
479 reported in **Figure 4**) have the same set of free parameters including the magnitude of sensory  
480 noise ( $\sigma$ ), the magnitude (concentration parameter) of decision noise ( $\alpha$ ), three boundaries for  
481 converting continuous confidence variable to button press ( $b_1, b_2, b_3$ ) and a lapse rate  $\lambda$ .

482 For each of the three confidence models, we tested two versions of the reduced models  
483 (reported in **Supplementary Figure 4** and **Supplementary Figure 5**). In one version, we  
484 kept the sensory noise ( $\sigma$ ) in the model while removing the decision noise ( $\alpha$ ). In the other  
485 version we kept the decision noise ( $\alpha$ ) in the model while removing the sensory noise ( $\sigma$ ).

486

### 487 **Model Recovery**

488 To evaluate our ability to distinguish the three models, we performed a model recovery  
489 analysis. Based on the design of Experiment 1, we synthesized 10 datasets for each of the  
490 confidence models. To ensure that the synthesized data resemble our experimental data, we  
491 synthesized the data using the group-averaged best-fitting parameter values obtained in  
492 Experiment 1. We then fit each of the 30 datasets (3 generating models with 10 datasets each)  
493 with the 3 models. Supplementary Figure 3 illustrates the results averaged over 10 datasets for  
494 each of the generating model.

495

### 496 **Data visualization**

497 For Experiment 1 and 3, we used a sliding window to visualize the psychometric curves,  
498 defined as the confidence ratings as a function of horizontal location of the target dot. The  
499 sliding window had a width of  $0.6^\circ$ . We moved the window horizontally (in a step of  $0.1^\circ$ )  
500 from the left to the right of the screen center. At each step, we computed mean confidence  
501 rating by averaging the confidence reports  $c$  of all the trials fell within the window (based on  
502 the horizontal target location of each trial). We first applied this procedure to individual data,  
503 and then averaged the individual psychometric curves across subjects (the black curves in  
504 **Figure 3B** and **Supplementary Figure 6B**). For Experiment 1, we visualized the data ranging  
505 from  $-3.5^\circ$  to  $+3.5^\circ$  from the screen center. For Experiment 3, we visualized the data ranging  
506 from  $-5^\circ$  to  $+5^\circ$  from the center. These ranges were chosen so that each steps along the black  
507 curves in **Figure 3B** and **Supplementary Figure 6B** contained at least 5 trials per subject on  
508 average. To visualize the model fit, we sampled a series of target dot locations along the  
509 horizontal axis (in a step of  $0.1^\circ$ ), and we used the best-fitting parameters to compute the  
510 confidence rating predicted by the models for each target location. We then used the same  
511 procedure (a sliding window) to compute the mean confidence rating predicted by the models  
512 (the blue curves in **Figure 3B** and **Supplementary Figure 6B**).

513 For Experiment 2, the “psychometric curve” became a heat map in a two-dimensional  
514 space (**Figure 5**). We tiled the two-dimensional space with non-overlapped hexagonal spatial  
515 windows (with a radius of  $0.25^\circ$ ) positioned from  $-3^\circ$  to  $+3^\circ$  (**Figure 5A**) along both  
516 horizontal and vertical axis. To compute the mean confidence rating for each hexagonal  
517 window, we averaged the confidence ratings across all the trials fell within that window for  
518 each participant. If the number of trials was zero among all the participants for a window, that  
519 window was left as white in **Figure 5A**. To visualize the model fit, we used the best-fitting  
520 parameters and computed the confidence rating predicted by the models for an array of target  
521 locations (a grid tiling the two-dimensional space with a step of  $0.1^\circ$  along both horizontal  
522 and vertical axis). The predicted confidence rating was then averaged within each hexagonal  
523 window.

524

525 **Acknowledgement**

526 We thank members of the Ma Lab, Hui-Kuan Chung, Rachel Denison, and Michael Landy  
527 for helpful comments on the manuscript.

528

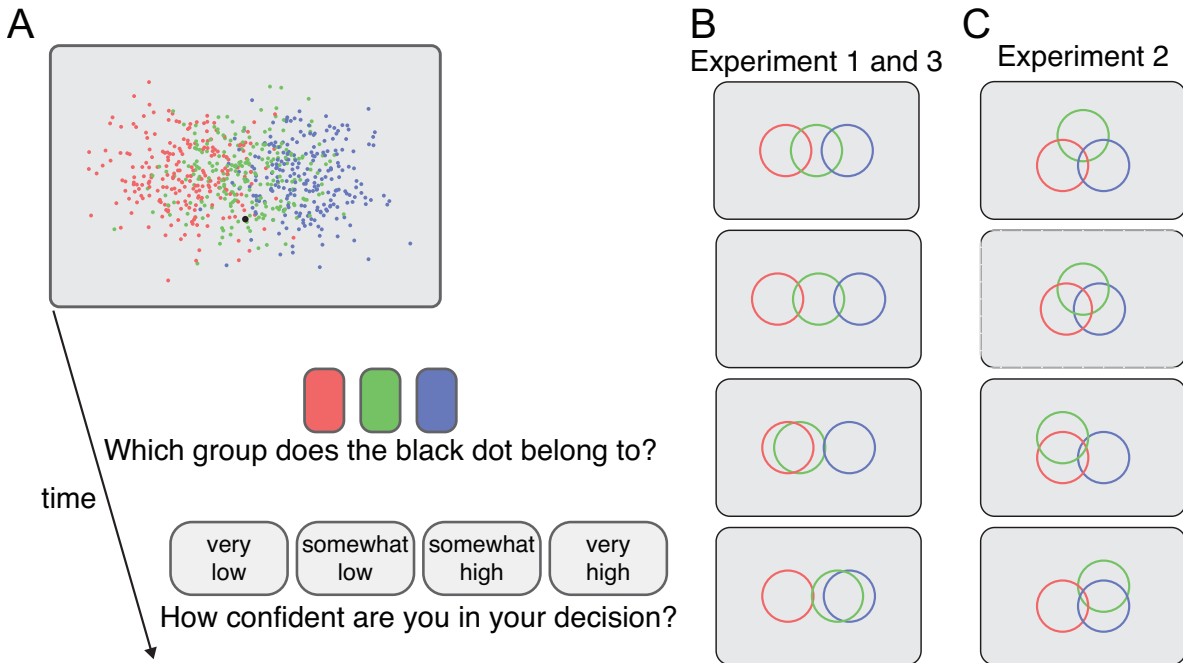

529

530

531 Figure 1. (A) Experimental procedure. Each trial started with the presentation of the stimulus  
532 including exemplar dots in three different colors representing the distribution of each of the  
533 three categories and one target dot, the black dot. Observers first reported their decisions in  
534 the categorization task and then reported their confidence by using the rectangular buttons  
535 presented at the bottom of the screen. (B) and (C) Schematic representation of the distribution  
536 of the categories. The circles are centered at the mean location of each category. The width of  
537 the circles corresponds to 2.5 times the standard deviation of the category distribution. (B)  
538 The four conditions tested in Experiment 1 and 3. (C) The four conditions tested in  
539 Experiment 2. The exemplar dots in (A) are based on the distribution depicted in the top panel  
540 in (B).

541

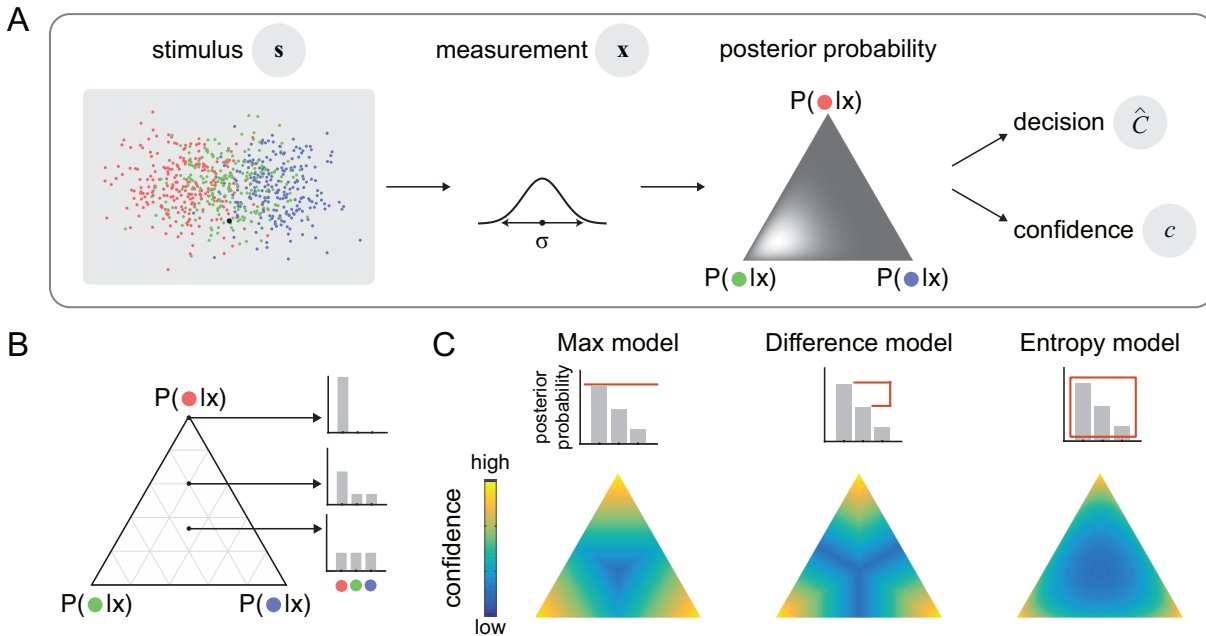

542

543 Figure 2. (A) Generative model. Target position is represented by  $s$ . Two sources of  
 544 variability are considered in the model: First, observers have access to noisy measurement  $x$ , a  
 545 Gaussian distribution centered at  $s$  with a standard deviation  $\sigma$ . Second, given the same  
 546 measurement  $x$ , the posterior distribution varies across trials due to decision noise, modeled  
 547 by Dirichlet distribution, of which spread (represented by the shade of the ternary plot) is  
 548 controlled by a parameter  $\alpha$  (see Methods). On each trial, a decision  $\hat{C}$  and a confidence  $c$  are  
 549 read out from the posterior distribution of that trial. (B) We use ternary plots to represent all  
 550 possible posterior distributions. For example, a point at the center represents a uniform  
 551 posterior distribution; at the corners of the ternary plot, the posterior probability of one  
 552 category is one while the posterior for the other two categories are zeros. (C) The bar graphs  
 553 illustrate how confidence is read out from posterior probabilities in each model. The color of  
 554 each ternary plot represents the confidence as a function of posterior distribution for each  
 555 model. The color is scaled for each ternary plot (independently) to take the whole range of the  
 556 color bar.

557

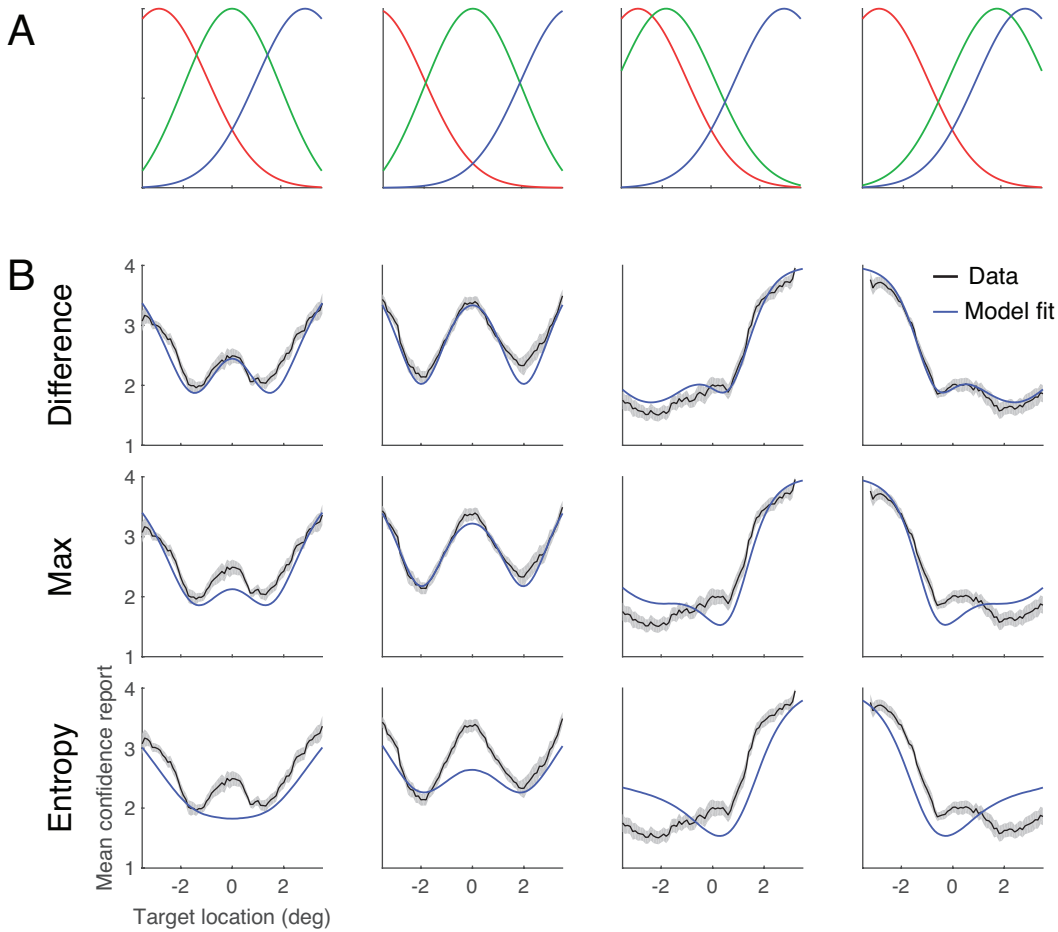

558

559 Figure 3. Experiment 1. (A) The distribution of the reference dots in each condition. (B) Mean  
560 mean confidence rating as a function of target position for each of the four conditions. The black  
561 curves represent group mean  $\pm$  1 s.e.m. Blue curves represent the model fit averaged across  
562 individuals.

563

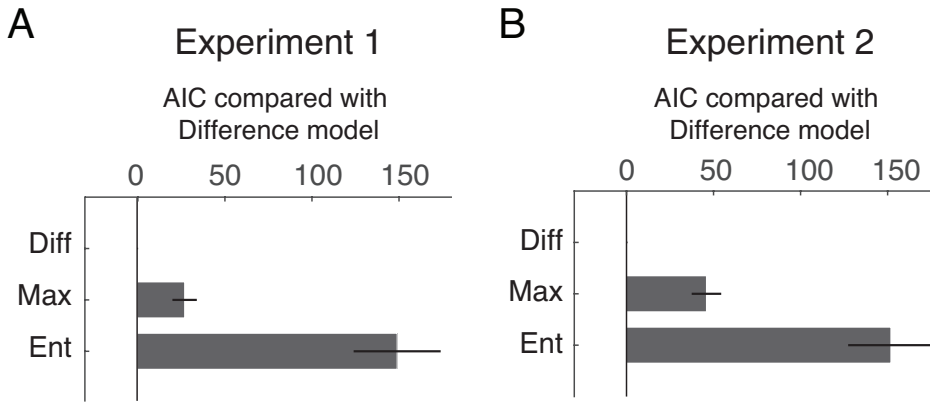

564

565 Figure 4. Model comparisons using  $\Delta AIC$ : AIC of each model compared with the Difference  
566 model. The bars represent  $\Delta AIC$  averaged across participants. The error bars represent  $\pm 1$   
567 s.e.m across participants. (A) Experiment 1. (B) Experiment 2.

568



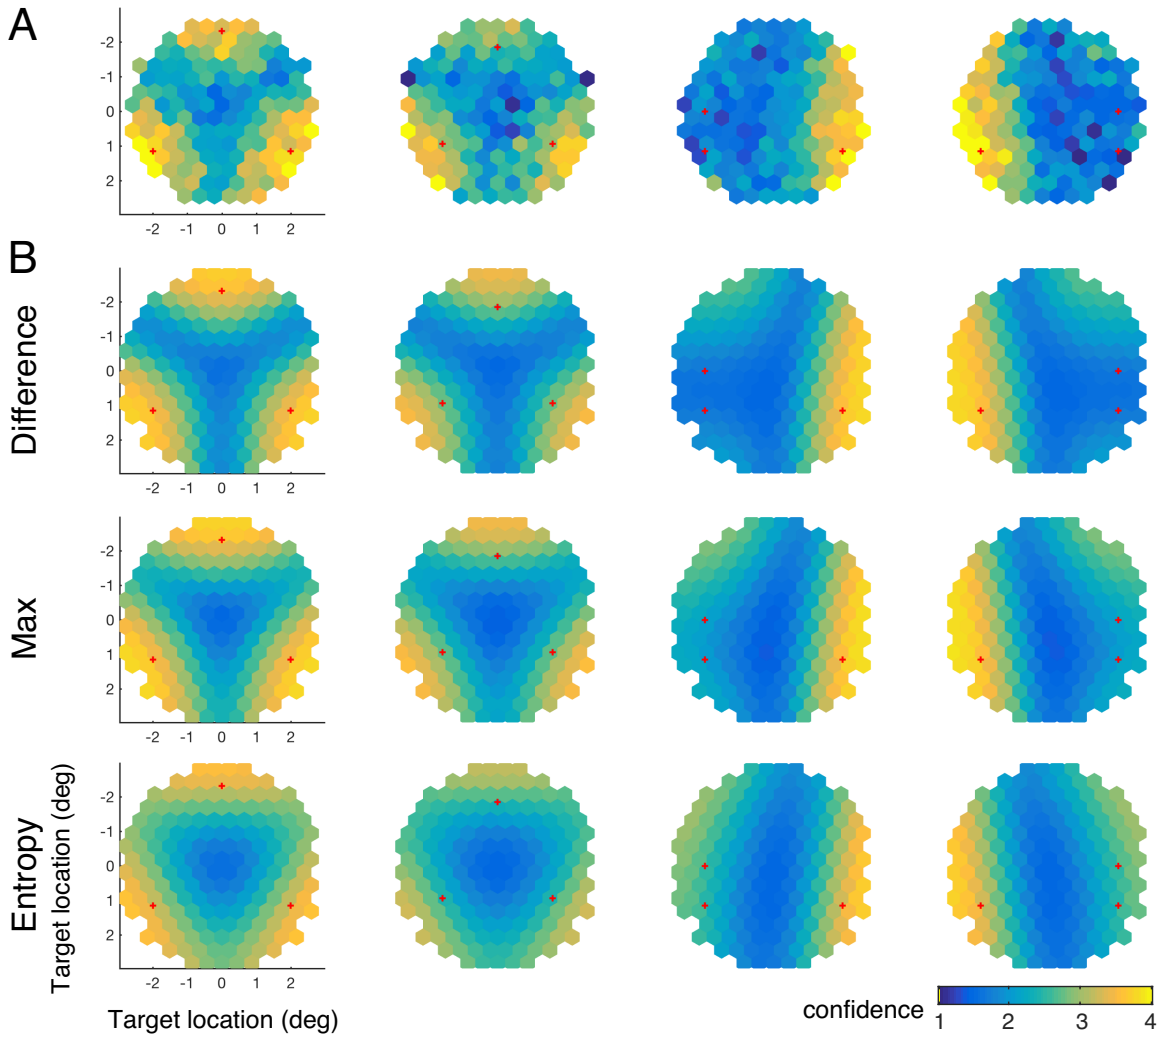

569

570 Figure 5. Experiment 2. (A) The mean confidence rating as a function of target positions. (B)

571 Model fit averaged across individuals. The red crosses in each panel represent the center of

572 each of the three categories.

## 573 **References**

- 574 1. Persaud N, McLeod P, Cowey A. Post-decision wagering objectively  
575 measures awareness. *Nature neuroscience* **10**, 257 (2007).
- 576 2. Van den Berg R, Zylberberg A, Kiani R, Shadlen MN, Wolpert DM. Confidence  
577 Is the Bridge between Multi-stage Decisions. *Current Biology* **26**, 3157-3168  
578 (2016).
- 579 3. Meyniel F, Schlunegger D, Dehaene S. The sense of confidence during  
580 probabilistic learning: A normative account. *PLoS computational biology* **11**,  
581 e1004305 (2015).
- 582 4. Bahrami B, Olsen K, Latham PE, Roepstorff A, Rees G, Frith CD. Optimally  
583 interacting minds. *Science* **329**, 1081-1085 (2010).
- 584 5. Vaghi MM, Luyckx F, Sule A, Fineberg NA, Robbins TW, De Martino B.  
585 Compulsivity Reveals a Novel Dissociation between Action and Confidence.  
586 *Neuron* **96**, 348-354. e344 (2017).
- 587 6. Fleming SM, Lau HC. How to measure metacognition. *Frontiers in human*  
588 *neuroscience* **8**, 443 (2014).
- 589 7. Mamassian P. Visual Confidence. *Annual Review of Vision Science* **2**, 459-  
590 481 (2016).
- 591 8. Kepecs A, Mainen ZF. A computational framework for the study of confidence  
592 in humans and animals. *Philosophical Transactions of the Royal Society of*  
593 *London B: Biological Sciences* **367**, 1322-1337 (2012).
- 594 9. Yeung N, Summerfield C. Metacognition in human decision-making:  
595 confidence and error monitoring. *Phil Trans R Soc B* **367**, 1310-1321 (2012).
- 596 10. De Martino B, Fleming SM, Garrett N, Dolan RJ. Confidence in value-based  
597 choice. *Nature neuroscience* **16**, 105 (2013).
- 598 11. Lebreton M, Abitbol R, Daunizeau J, Pessiglione M. Automatic integration of  
599 confidence in the brain valuation signal. *Nature neuroscience* **18**, 1159 (2015).
- 600 12. Polania R, Woodford M, Ruff CC. Efficient coding of subjective value. *Nature*  
601 *neuroscience* **22**, 134 (2019).
- 602 13. Pouget A, Drugowitsch J, Kepecs A. Confidence and certainty: distinct  
603 probabilistic quantities for different goals. *Nature neuroscience* **19**, 366 (2016).
- 604

- 605 14. Drugowitsch J, Moreno-Bote R, Pouget A. Relation between belief and  
606 performance in perceptual decision making. *PLoS one* **9**, e96511 (2014).
- 607 15. Clarke FR, Birdsall TG, Tanner Jr WP. Two types of ROC curves and  
608 definitions of parameters. *The Journal of the Acoustical Society of America* **31**,  
609 629-630 (1959).
- 610 16. Galvin SJ, Podd JV, Drga V, Whitmore J. Type 2 tasks in the theory of signal  
611 detectability: Discrimination between correct and incorrect decisions.  
612 *Psychonomic Bulletin & Review* **10**, 843-876 (2003).
- 613 17. Peirce CS, Jastrow J. On small differences in sensation. (1884).
- 614 18. Kepecs A, Uchida N, Zariwala HA, Mainen ZF. Neural correlates, computation  
615 and behavioural impact of decision confidence. *Nature* **455**, 227 (2008).
- 616 19. Kiani R, Shadlen MN. Representation of confidence associated with a decision  
617 by neurons in the parietal cortex. *science* **324**, 759-764 (2009).
- 618 20. Komura Y, Nikkuni A, Hirashima N, Uetake T, Miyamoto A. Responses of  
619 pulvinar neurons reflect a subject's confidence in visual categorization. *Nature*  
620 *neuroscience* **16**, 749 (2013).
- 621 21. Sanders JI, Hangya B, Kepecs A. Signatures of a statistical computation in the  
622 human sense of confidence. *Neuron* **90**, 499-506 (2016).
- 623 22. Barthelmé S, Mamassian P. Flexible mechanisms underlie the evaluation of  
624 visual confidence. *Proceedings of the National Academy of Sciences* **107**,  
625 20834-20839 (2010).
- 626 23. Navajas J, Hindocha C, Foda H, Keramati M, Latham PE, Bahrami B. The  
627 idiosyncratic nature of confidence. *Nature human behaviour* **1**, 810 (2017).
- 628 24. Aitchison L, Bang D, Bahrami B, Latham PE. Doubly Bayesian analysis of  
629 confidence in perceptual decision-making. *PLoS computational biology* **11**,  
630 e1004519 (2015).
- 631 25. Adler WT, Ma WJ. Comparing Bayesian and non-Bayesian accounts of human  
632 confidence reports. *PLOS Computational Biology* **14**, e1006572 (2018).
- 633 26. Drugowitsch J, Wyart V, Devauchelle A-D, Koechlin E. Computational  
634 precision of mental inference as critical source of human choice suboptimality.  
635 *Neuron* **92**, 1398-1411 (2016).
- 636

- 637 27. Keshvari S, Van den Berg R, Ma WJ. Probabilistic computation in human  
638 perception under variability in encoding precision. *PLoS One* **7**, e40216  
639 (2012).
- 640 28. Shen S, Ma WJ. Variable precision in visual perception. *Psychological Review*  
641 **126**, 89-132 (2019).
- 642 29. van den Berg R, Yoo AH, Ma WJ. Fechner's law in metacognition: A  
643 quantitative model of visual working memory confidence. *Psychological review*  
644 **124**, 197 (2017).
- 645 30. Schwarz G. Estimating the dimension of a model. *The annals of statistics* **6**,  
646 461-464 (1978).
- 647 31. Kiani R, Corthell L, Shadlen MN. Choice certainty is informed by both  
648 evidence and decision time. *Neuron* **84**, 1329-1342 (2014).
- 649 32. Moran R, Teodorescu AR, Usher M. Post choice information integration as a  
650 causal determinant of confidence: Novel data and a computational account.  
651 *Cognitive psychology* **78**, 99-147 (2015).
- 652 33. Pleskac TJ, Busemeyer JR. Two-stage dynamic signal detection: a theory of  
653 choice, decision time, and confidence. *Psychological review* **117**, 864 (2010).
- 654 34. Yu S, Pleskac TJ, Zeigenfuse MD. Dynamics of postdecisional processing of  
655 confidence. *Journal of Experimental Psychology: General* **144**, 489 (2015).
- 656 35. Navajas J, Bahrami B, Latham PE. Post-decisional accounts of biases in  
657 confidence. *Current Opinion in Behavioral Sciences* **11**, 55-60 (2016).
- 658 36. Koizumi A, Maniscalco B, Lau H. Does perceptual confidence facilitate  
659 cognitive control? *Attention, Perception, & Psychophysics* **77**, 1295-1306  
660 (2015).
- 661 37. Zylberberg A, Barttfeld P, Sigman M. The construction of confidence in a  
662 perceptual decision. *Front Integr Neurosci* **6**, 2359-2374 (2012).
- 663 38. Peters MA, *et al.* Perceptual confidence neglects decision-incongruent  
664 evidence in the brain. *Nature human behaviour* **1**, 0139 (2017).
- 665 39. Maniscalco B, Lau H. A signal detection theoretic approach for estimating  
666 metacognitive sensitivity from confidence ratings. *Consciousness and*  
667 *cognition* **21**, 422-430 (2012).
- 668 40. Desender K, Boldt A, Yeung N. Subjective confidence predicts information  
669 seeking in decision making. *Psychological science* **29**, 761-778 (2018).

670

- 671 41. Brown S, Steyvers M, Wagenmakers E-J. Observing evidence accumulation  
672 during multi-alternative decisions. *Journal of Mathematical Psychology* **53**,  
673 453-462 (2009).
- 674 42. Markant DB, Settles B, Gureckis TM. Self-directed learning favors local, rather  
675 than global, uncertainty. *Cognitive science* **40**, 100-120 (2016).
- 676 43. Kahneman D, Tversky A. Prospect theory: An analysis of decision under risk.  
677 In: *Handbook of the fundamentals of financial decision making: Part I*  
678 (ed<sup>^</sup>(eds). World Scientific (2013).
- 679 44. Carandini M, Heeger DJ. Normalization as a canonical neural computation.  
680 *Nature Reviews Neuroscience* **13**, 51-62 (2012).
- 681 45. Louie K, Gratton LE, Glimcher PW. Reward value-based gain control: divisive  
682 normalization in parietal cortex. *Journal of Neuroscience* **31**, 10627-10639  
683 (2011).
- 684 46. Hampton RR. Rhesus monkeys know when they remember. *Proceedings of*  
685 *the National Academy of Sciences* **98**, 5359-5362 (2001).
- 686 47. Foote AL, Crystal JD. Metacognition in the rat. *Current Biology* **17**, 551-555  
687 (2007).
- 688 48. Odegaard B, Grimaldi P, Cho SH, Peters MA, Lau H, Basso MA. Superior  
689 colliculus neuronal ensemble activity signals optimal rather than subjective  
690 confidence. *Proceedings of the National Academy of Sciences*, 201711628  
691 (2018).
- 692 49. Churchland AK, Kiani R, Shadlen MN. Decision-making with multiple  
693 alternatives. *Nature neuroscience* **11**, 693 (2008).
- 694 50. Churchland AK, Ditterich J. New advances in understanding decisions among  
695 multiple alternatives. *Current opinion in neurobiology* **22**, 920-926 (2012).
- 696 51. Ditterich J. A comparison between mechanisms of multi-alternative perceptual  
697 decision making: ability to explain human behavior, predictions for  
698 neurophysiology, and relationship with decision theory. *Frontiers in*  
699 *neuroscience* **4**, 184 (2010).
- 700 52. Acerbi L, Wolpert DM, Vijayakumar S. Internal representations of temporal  
701 statistics and feedback calibrate motor-sensory interval timing. *PLoS*  
702 *computational biology* **8**, e1002771 (2012).

703

- 704 53. van den Berg R, Awh E, Ma WJ. Factorial comparison of working memory  
705 models. *Psychological review* **121**, 124 (2014).
- 706 54. Daunizeau J, Preuschoff K, Friston K, Stephan K. Optimizing experimental  
707 design for comparing models of brain function. *PLoS computational biology* **7**,  
708 e1002280 (2011).
- 709 55. Acerbi L, Ma WJ. Practical Bayesian Optimization for Model Fitting with  
710 Bayesian Adaptive Direct Search. In: *Advances in Neural Information*  
711 *Processing Systems* (ed<sup>^</sup>(eds) (2017).
- 712
- 713

## Supplementary Information

### Supplementary Tables

|       | Inference + sensory noise |               |               | Inference noise only |               |               | Sensory noise only |               |               |
|-------|---------------------------|---------------|---------------|----------------------|---------------|---------------|--------------------|---------------|---------------|
|       | Diff                      | Max           | Ent           | Diff                 | Max           | Ent           | Diff               | Max           | Ent           |
| Exp 1 |                           | 27.3<br>(7.0) | 149.4<br>(24) | 9.9<br>(3.1)         | 34.4<br>(7.2) | 147.7<br>(24) | 57.3<br>(6.5)      | 98.7<br>(12)  | 317.1<br>(31) |
| Exp 2 |                           | 45.9<br>(8.5) | 151.9<br>(25) | 13.6<br>(5.5)        | 57.8<br>(10)  | 154.8<br>(23) | 85.5<br>(12)       | 108.5<br>(14) | 201.1<br>(27) |
| Exp 3 |                           | 10.3<br>(2.9) | 93.2<br>(18)  | 9.27<br>(2.7)        | 17.9<br>(3.7) | 91.5<br>(18)  | 85.5<br>(8.9)      | 139.2<br>(13) | 327.7<br>(24) |

Supplementary Table 1. The  $\Delta AIC$  of each model, computed as the AIC of each model minus the AIC of the Difference model with both decision and sensory noise.  $\Delta AIC$  is computed for individual participant. The top number in each cell is the  $\Delta AIC$  averaged across participants. The numbers in the parenthesis represent one standard error of mean across participants.

## Supplementary Figures

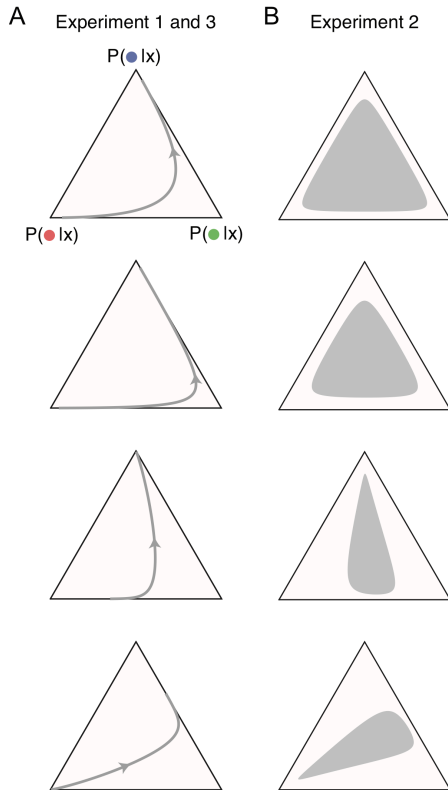

Supplementary Figure 1. Illustration of how observers' belief, posterior distribution, about the target category could change as a function of the target dot position. For illustration purpose, we considered a simplified case in which there is no sensory noise and no decision noise, so the posterior distribution only depends the target dot position and the distribution of each category. (A) Experiment 1 and 3: The four panels correspond to the four conditions depicted in Figure 1B. The gray lines and the arrows indicate the trajectory of the posterior distribution on the ternary plot as a target dot move from the left-end to the right-end of the screen. (B) Experiment 2: The four panels correspond to the four conditions depicted in Figure 1C. In the experiment, the target dot was uniformly sampled within a circle at the center of the screen with a radius of  $2.6^\circ$  (see Methods and S1 Experimental procedures). All possible target dot locations within the circle correspond to a range of posterior probabilities indicated by the gray region in each panel.



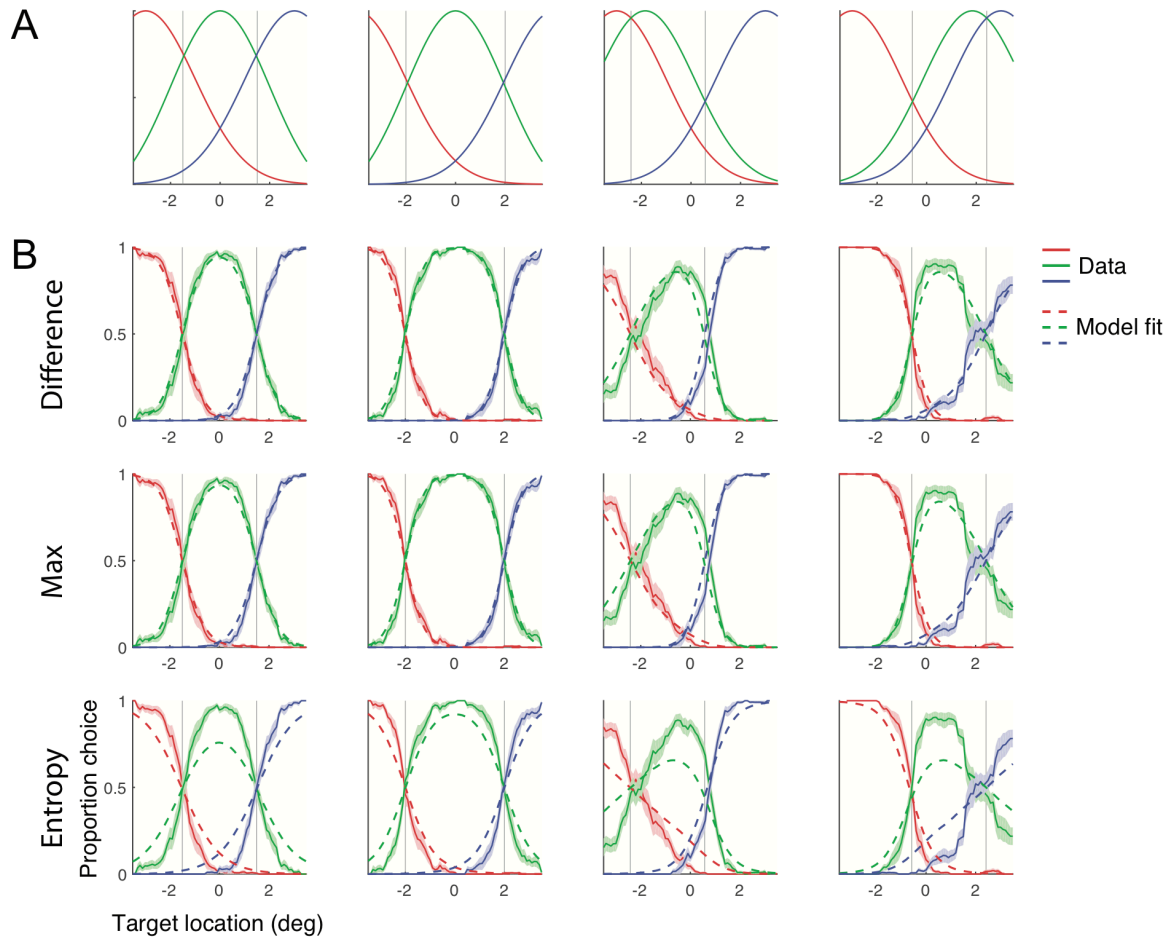

Supplementary Figure 2. Experiment 1. (A) Distribution of the reference dots in each condition. (B) The red (green, blue) lines represent the probability that the observers categorize the target dot to the red (green, blue) category as a function of the target dot location. Solid lines represent the group mean  $\pm$  1 s.e.m. The dashed lines represent the model fit averaged across individuals. In both (A) and (B), the gray vertical lines represent the boundary between two categories, the location where two categories have the same likelihood.

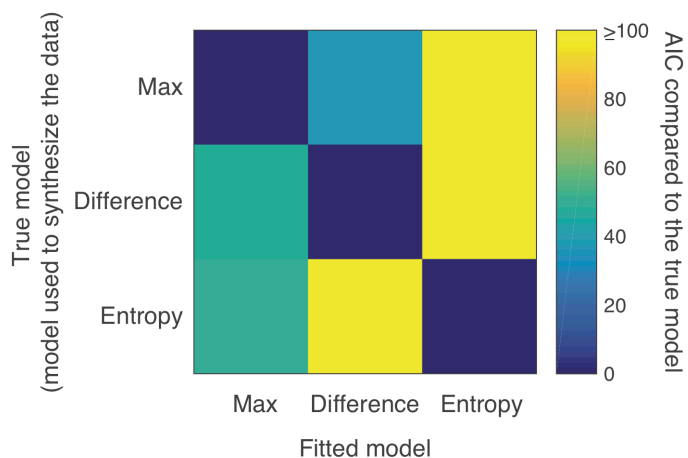

Supplementary Figure 3. Model recovery analysis. The colors represent  $\Delta\text{AIC}$  of each fitted model, computed as the AIC of each fitted model minus the AIC of the fitted model using the true model.

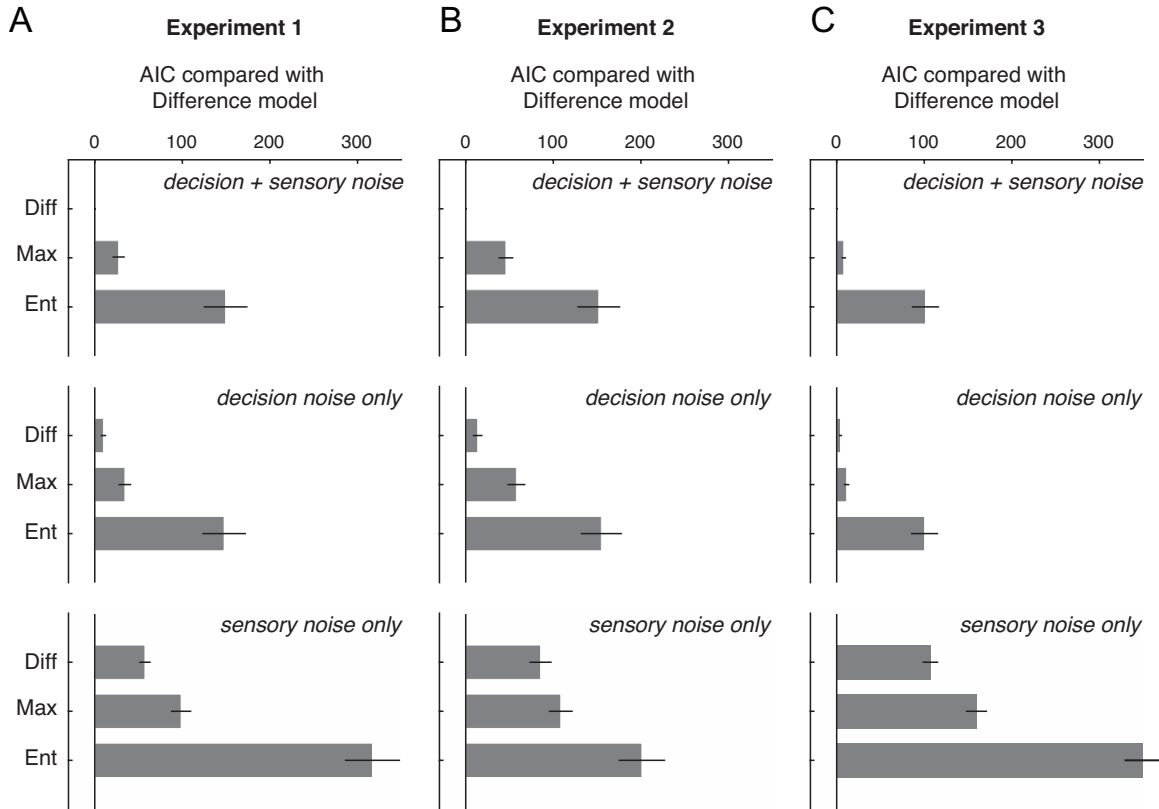

Supplementary Figure 4. Model comparison using AIC for both the full models (with both sensory and decision noise in the model; the top row) and the reduced models (with only the decision noise or only the sensory noise in the model; the middle and the bottom rows). (A) Experiment 1 (B) Experiment 2 and (C) Experiment 3. The bars represent  $\Delta AIC$  (AIC of each model compared with the full Difference model) averaged across participants. The error bars represent  $\pm 1$  s.e.m across participants.

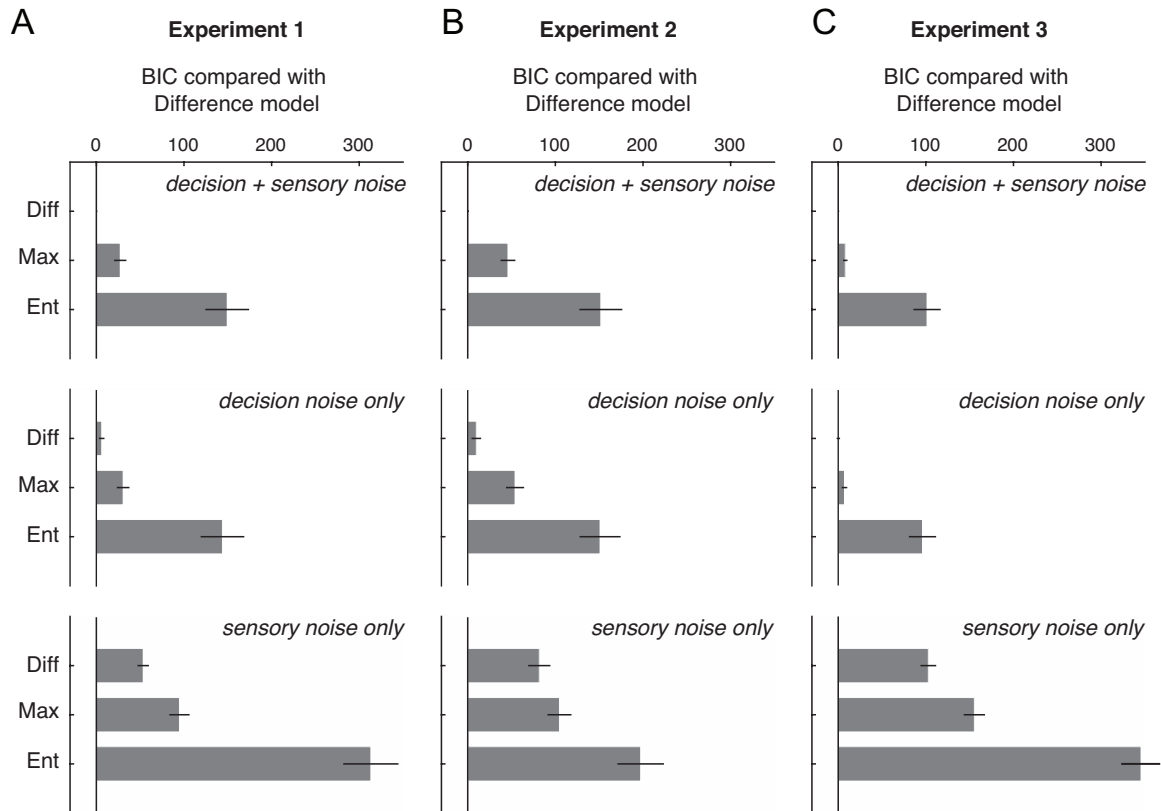

Supplementary Figure 5. Model comparison using BIC for both the full models (with both sensory and decision noise in the model; the top row) and the reduced models (with only the decision noise or only the sensory noise in the model; the middle and the bottom rows). (A) Experiment 1 (B) Experiment 2 and (C) Experiment 3. The bars represent  $\Delta BIC$  (BIC of each model compared with the full Difference model) averaged across participants. The error bars represent  $\pm 1$  s.e.m across participants.

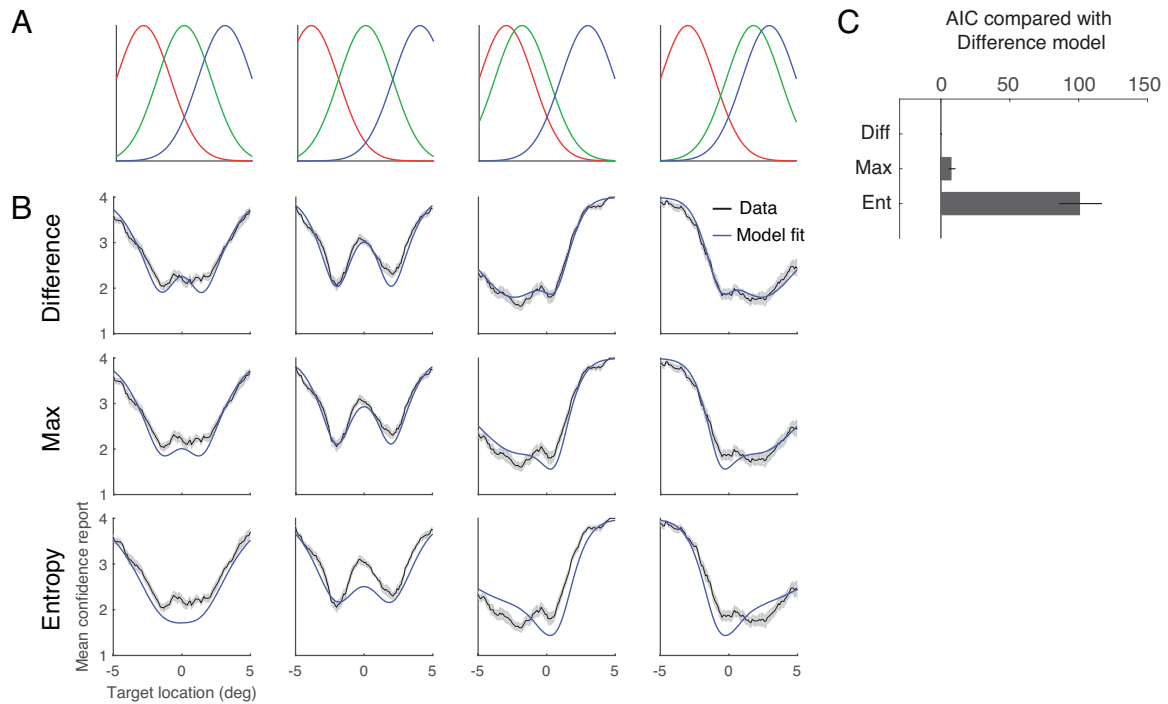

Supplementary Figure 6. Experiment 3. (A) The distribution of the reference dots in each condition. (B) Mean confidence rating as a function of target position for each of the four conditions. The black curves represent group mean  $\pm$  1 s.e.m. Blue curves represent the model fit averaged across individuals. (C) Model comparisons using  $\Delta$ AIC: AIC of each model compared with the Difference model. The bars represent  $\Delta$ AIC averaged across participants. The error bars represent  $\pm$  1 s.e.m across participants.

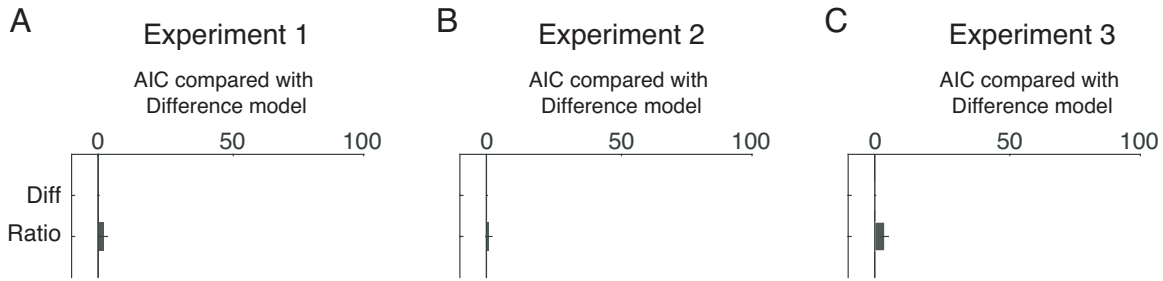

1

2 Supplementary Figure 7. Model comparison between the full Difference model and the full

3 Ratio model using AIC (A) Experiment 1 (B) Experiment 2 and (C) Experiment 3. The bars

4 represent  $\Delta AIC$  (AIC of each model compared with the full Difference model) averaged

5 across participants. The error bars represent  $\pm 1$  s.e.m across participants.

6
